# Supplementary material for: CAP2 promotes gastric cancer metastasis by mediating the interaction between tumor cells and tumor-associated macrophages
Source: PubMed Central journal article supplement (PMC10617780; doi:10.1172/jci166224), 2023-11-01
Supplement: jci-133-166224-s229.pdf [file jci-133-166224-s229.pdf]

# **CAP2 promotes gastric cancer metastasis by mediating the interaction between tumor cells and tumor-associated macrophages**

Guohao Zhang, Zhaoxin Gao, Xiangyu Guo, Ranran Ma, Xiaojie Wang, Pan Zhou, Chunlan Li, Zhiyuan Tang, Ruinan Zhao, Peng Gao

**Supplementary material**

**Supplemental Table 1. Small molecule compounds**

| Name                        | Formula           | MolWeight  | docking score |
|-----------------------------|-------------------|------------|---------------|
| Rosavin                     | C20H28O10         | 428.430    | -9.008        |
| Scutellarin                 | C21H18O12         | 462.360    | -8.943        |
| Oroxin B                    | C27H30O15         | 594.518    | -8.210        |
| Homoplantagin               | C22H22O11         | 462.403    | -7.949        |
| Harpagoside                 | C24H30O11         | 494.488    | -7.881        |
| Salvianolic acid B          | C36H30O16         | 718.614    | -7.539        |
| Salvianolic acid A          | C26H22O10         | 494.447    | -7.487        |
| Eriocitrin                  | C27H32O15         | 596.534    | -7.388        |
| Proanthocyanidins           | C30H26O13         | 594.519640 | -7.232        |
| Corilagin                   | C27H22O18         | 634.452780 | -7.365        |
| Vaccarin                    | C32H38O19         | 726.632720 | -7.013        |
| Specnuezhenide              | C31H42O17         | 686.655    | -6.996        |
| Plantamajoside              | C29H36O16         | 640.587    | -6.950        |
| Dinoprost tromethamine      | C24H45NO8         | 475.616    | -6.946        |
| Acarbose                    | C25H43NO18        | 645.604820 | -6.926        |
| Fluvastatin sodium (Lescol) | C24H25FNNaO4      | 433.448    | -6.923        |
| LDC000067                   | C18H18N4O3S       | 370.426    | -6.916        |
| Rosuvastatin Calcium        | C44H54CaF2N6O12S2 | 1001.137   | -6.916        |
| Oroxin A                    | C21H20O10         | 432.377    | -6.903        |
| Forsythoside A              | C29H36O15         | 624.587    | -6.875        |

**Supplemental Table 2. siRNA (mix) sequences targeting CAP2.**

---

|          |                     |
|----------|---------------------|
| siCAP2-1 | GGAGUGAACUUCAAGCAUA |
| siCAP2-2 | GGAGUUGGAAGGAAAGAAA |

---

**Supplemental Table 3. The sequence of primers for qRT-PCR.**

| Gene                 | Forward primer               | Reverse primer                |
|----------------------|------------------------------|-------------------------------|
| <i>CAP2</i> (human)  | 5'-CCTGCCCTTGGATGGATAGC-3'   | 5'-GTGTGGTGTTCCTTGATGTATGC-3' |
| <i>RACK1</i> (human) | 5'-GCTGGTCAAGGTATGGAACC-3'   | 5'-GCGTGTAAGGTGTTGCCT-3'      |
| <i>FAK</i> (human)   | 5'-TTACCTGGGGAACCCCGACC-3'   | 5'-TGGTGAAGGATGAGGGCTCGT-3'   |
| <i>ERK1</i> (human)  | 5'-GCTGAATCACATCCTGGGTAT-3'  | 5'-AGATCTGTATCCTGGCTGGAA-3'   |
| <i>MEK</i> (human)   | 5'-GGGCTTCTATGGTGCCTTCTA-3'  | 5'-CCCACGGGAGTTGACTAGGAT-3'   |
| <i>JUN</i> (human)   | 5'-GAGCTGGAGCGCCTGATAAT-3'   | 5'-CCCTCTGCTCATCTGTCAC-3'     |
| <i>IL4</i> (human)   | 5'-CTGCTTCCCCCTCTGTTCTTC-3'  | 5'-TGATATCGCACTTGTGTCCGTG-3'  |
| <i>IL10</i> (human)  | 5'-CTGAGAACCAAGACCCAGACA-3'  | 5'-AAAGGCATTCTTCACCTGCTCC-3'  |
| <i>IL1B</i> (human)  | 5'-AGCTGGAGAGTGTAGATCCCAA-3' | 5'-ACGGGCATGTTTTCTGCTTG-3'    |
| <i>IL12A</i> (human) | 5'-CTCCTGGACCACCTCAGTTTG-3'  | 5'-AGGTTTTGGGAGTGGTGAAGG-3'   |
| <i>IL12B</i> (human) | 5'-CACAAAGGAGGCGAGGTTCT-3'   | 5'-TTTGGGTTCTTTCTGGTCCTT-3'   |
| <i>iNOS2</i> (human) | 5'-CGTGGAGACGGGAAAGAAGT-3'   | 5'-GACCCCAGGCAAGATTTGGA-3'    |
| <i>TNFA</i> (human)  | 5'-GAGGCCAAGCCCTGGTATG-3'    | 5'-CGGGCCGATTGATCTCAGC-3'     |
| <i>CD163</i> (human) | 5'-GGGCTAATTCCAGTGCAGGT-3'   | 5'-GCTGACTCATTCCCACGACA-3'    |
| <i>CD206</i> (human) | 5'-GATTGCAGGGGCTTATGGG-3'    | 5'-CGGACATTGGGTTCCGGGAG-3'    |
| <i>YMI</i> (human)   | 5'-TGGGAGTGAATGATGTGACG-3'   | 5'-TCTTCAGGTTGGGGTTCCTGT-3'   |
| <i>TGFBI</i> (human) | 5'-GCAACAATTCTGGCGATACC-3'   | 5'-ATTTCCCCTCCACGGCTCAA-3'    |
| <i>ARG1</i> (human)  | 5'-TGACGGACTGGACCCATCTT-3'   | 5'-GGCTTGTGATTACCCTCCCG--3'   |
| <i>TAK</i> (human)   | 5'-GCCCTCAACCACGACTTCTT-3'   | 5'-GGATTGCGACTCTGGTTGGT-3'    |
| <i>JNK1</i> (human)  | 5'-GATGCTGTGTGGAATCAAGCA-3'  | 5'-CCTCGGGTCTCTGTAGTAG-3'     |

|                          |                               |                               |
|--------------------------|-------------------------------|-------------------------------|
| <i>GAPDH</i> (human)     | 5'-ACAAC TTTGGTATCGTGGAAGG-3' | 5'-GCCATCACGCCACAGTTTC-3'     |
| <i>Cd11B</i> (mouse)     | CATGAATGATGCTTACCTGGGTTATG    | CCCAAAATAAGAGCCAATCTGG        |
| <i>Il12a</i> (mouse)     | 5'-CTCAGTTTGGCCAGGGTCAT-3'    | 5'-TCTTCAGCAGGTTTCGGGAC-3'    |
| <i>Tnfa</i> (mouse)      | 5'- CCTCTCATGCACCACCATCA-3'   | 5'- GCATTGCACCTCAGGGAAGA-3'   |
| <i>Il1b</i> (mouse)      | 5'- AAGGGGACATTAGGCAGCAC-3'   | 5'- ATGAAAGACCTCAGTGCGGG-3'   |
| <i>Cd163</i> (mouse)     | 5'-GCAAAAAC TGGCAGTGGG-3'     | 5'-GTCAAAATCACAGACGGAG        |
| <i>Arg1</i> (mouse)      | 5'-CAATGAAGAGCTGGCTGGTGT-3'   | 5'-GTGTGAGCATCCACCCAAATG      |
| <i>Tgfb</i> (mouse)      | 5'-GTCCAAACTAAGGCTCGCCA-3'    | 5'-ATAGATGGCGTTGTTGCGGT-3'    |
| <i>Ym1</i> (mouse)       | 5'-GAAGCTCTCCAGAAGCAATCCT-3'  | 5'-CTGGTAGGAAGATCCCAGCTGTA-3' |
| <i>CAP2-ChIP</i> (human) | 5'-AGCCAAGTGGGTTTGGTTACT-3'   | 5'-CTGGGAGGAGAAGGAGCTAGA-3'   |

---

**Supplemental Table 4. Antibodies**

| Antibody     | Source      | Dilution | Catalog Number |
|--------------|-------------|----------|----------------|
| CAP2(WB)     | Proteintech | 1:1000   | 15865-1-AP     |
| RACK1(WB)    | Proteintech | 1:1000   | 27592-1-AP     |
| GAPDH(WB)    | CST         | 1:1000   | 5174T          |
| FAK(WB)      | CST         | 1:1000   | 3285T          |
| p-FAK(WB)    | CST         | 1:1000   | 8556T          |
| ERK1/2(WB)   | CST         | 1:1000   | 4695T          |
| p-ERK1/2(WB) | CST         | 1:1000   | 4370T          |
| MEK(WB)      | CST         | 1:1000   | 4694T          |
| p-MEK(WB)    | CST         | 1:1000   | 3958T          |
| SRC(WB)      | Santa Cruz  | 1:1000   | sc-376476      |
| p-SRC(WB)    | CST         | 1:1000   | 6943T          |
| TAK(WB)      | CST         | 1:1000   | 5206S          |
| p-TAK(WB)    | CST         | 1:1000   | 9339S          |
| JNK1(WB)     | CST         | 1:1000   | 3708T          |
| p-JNK1(WB)   | CST         | 1:1000   | 9255S          |
| JUN(WB)      | Santa Cruz  | 1:1000   | sc-7345        |
| p-JUN(WB)    | Abcam       | 1:1000   | ab32385        |
| IL4(WB)      | CST         | 1:1000   | 12227S         |
| IL10(WB)     | CST         | 1:1000   | 12163S         |
| His tag (WB) | CST         | 1:1000   | 3724S          |

|             |             |        |            |
|-------------|-------------|--------|------------|
| HA tag (WB) | CST         | 1:1000 | 12698S     |
| CAP2(IF)    | Proteintech | 1:100  | 15865-1-AP |
| RACK1(IF)   | Proteintech | 1:100  | 66940      |
| CD163(IF)   | Proteintech | 1:100  | 16646S     |
| CD206(IF)   | Santa Cruz  | 1:100  | sc-376108  |

---

CST, Cell Signaling Technology ; WB, western blot; IF, Immunofluorescence.

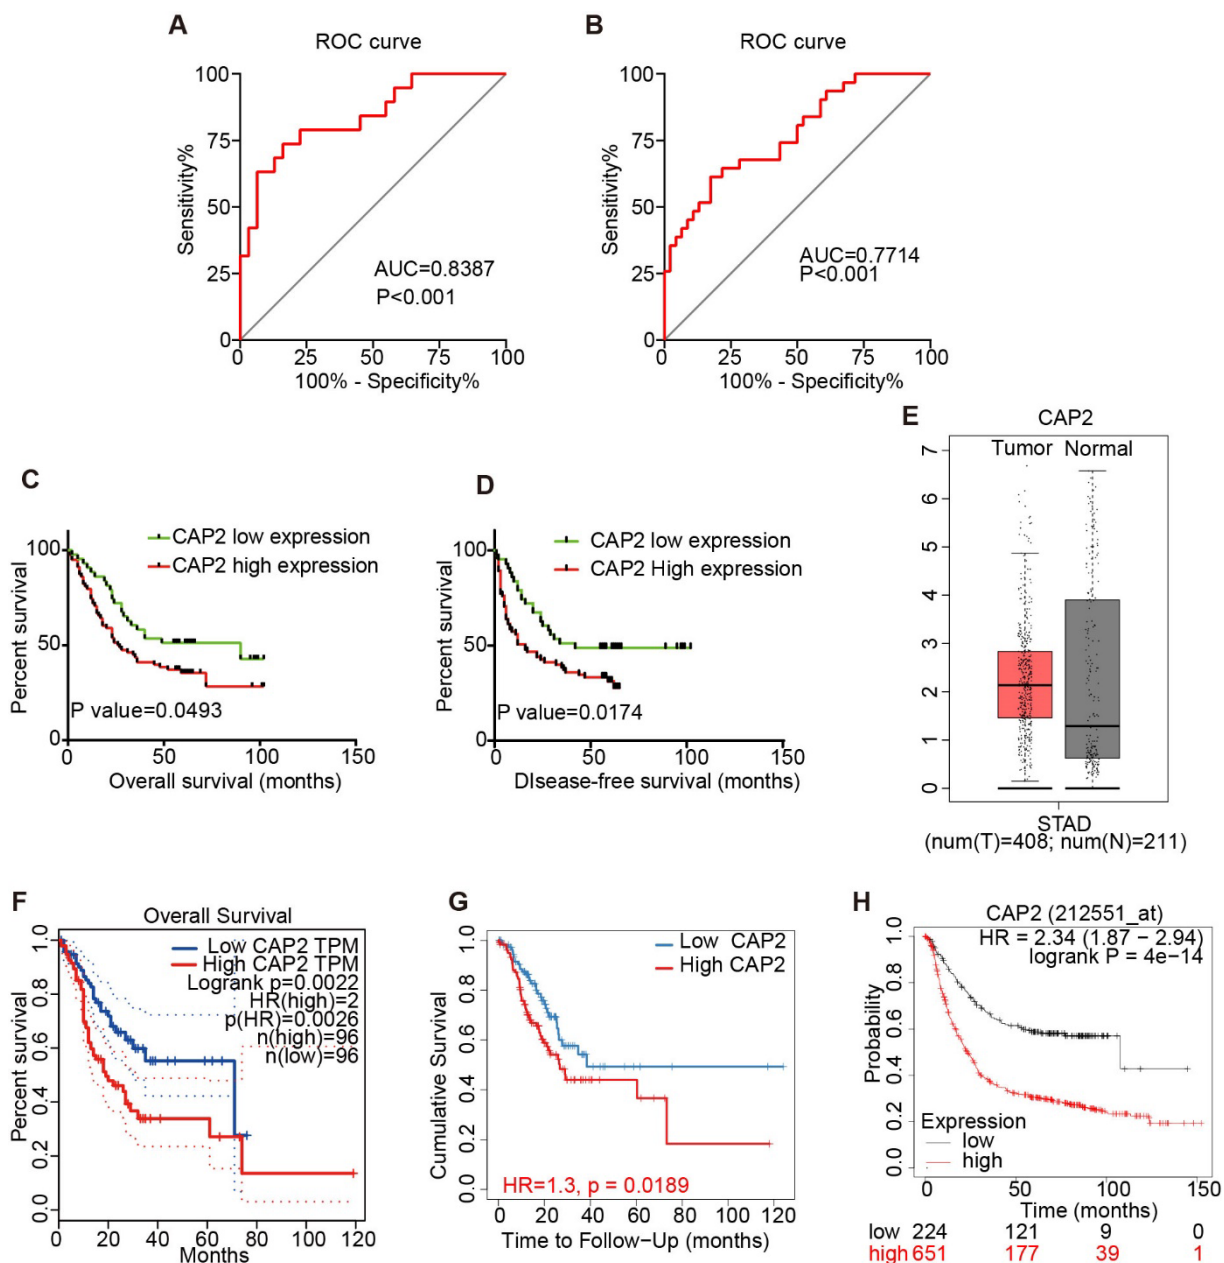

**Supplemental Figure 1. CAP2 could be used as a diagnostic marker in GC.** (A) Area under the ROC curve for *CAP2* in the differential diagnosis of gastric mucosa and GC. (B) Area under the ROC curve for *CAP2* in GC tissues with LNM or without LNM. (C and D) Kaplan–Meier curves of overall survival and disease-free survival for *CAP2* expression (ROC curve analysis was used to obtain the cut-off values. The immunohistochemistry score of >7 was defined as high expression of *CAP2*.  $n[\text{low}] = 43$ ,  $n[\text{high}] = 79$ ). (E) The expression of *CAP2* in GC tissues and normal tissues was analyzed with GEPIA. (F) Correlation between *CAP2* expression and overall survival of patients with GC in the GEPIA dataset (<http://gepia.cancer-pku.cn/>). (G) Timer2.0 online analysis showed that patients with high *CAP2* expression had a poor prognosis compared with patients with low expression. (H) The Kaplan-Meier Plotter showed poor overall survival in patients with high *CAP2* expression. logrank test (C, D). \* $P < 0.05$ , \*\* $P < 0.01$ , \*\*\* $P < 0.001$ .



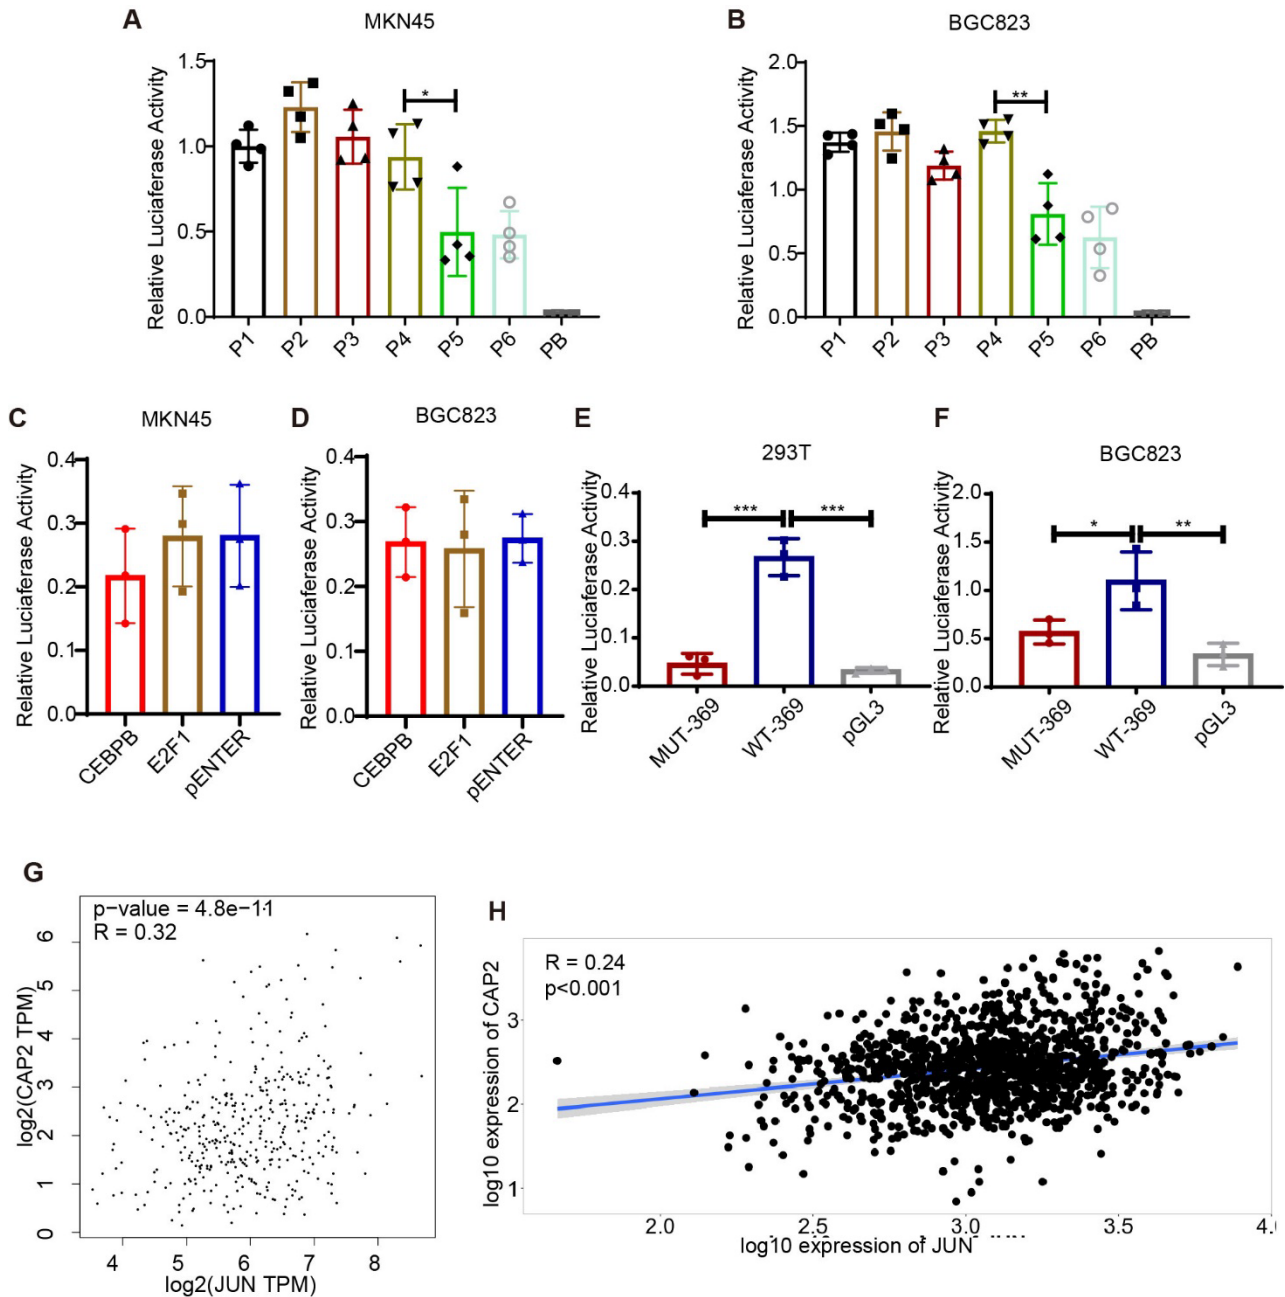

**Supplemental Figure 2. JUN activates *CAP2* transcription.** (A and B) Transcriptional activity of the putative *CAP2* promoter fragments in GC cells was analyzed by dual-luciferase reporter assays. (C and D) Dual-luciferase reporter assays showed that CEBP $\beta$  and E2F1 did not affect the promoter activity of pGL3-500/0 ( $n = 3$ ). (E and F) Dual luciferase activity assays indicated that JUN binding mutants were unable to enhance pGL-500 promoter activity in HEK293-T and BGC823 cells ( $n = 3$ ). (G and H) GEPIA (G) and TNMplot (H) analyses showed a positive correlation between *JUN* and *CAP2* expression. Data are presented as the mean  $\pm$  SD. one-way ANOVA with Tukey's multiple comparison test (A-F). \* $P < 0.05$ , \*\* $P < 0.01$ , \*\*\* $P < 0.001$ .

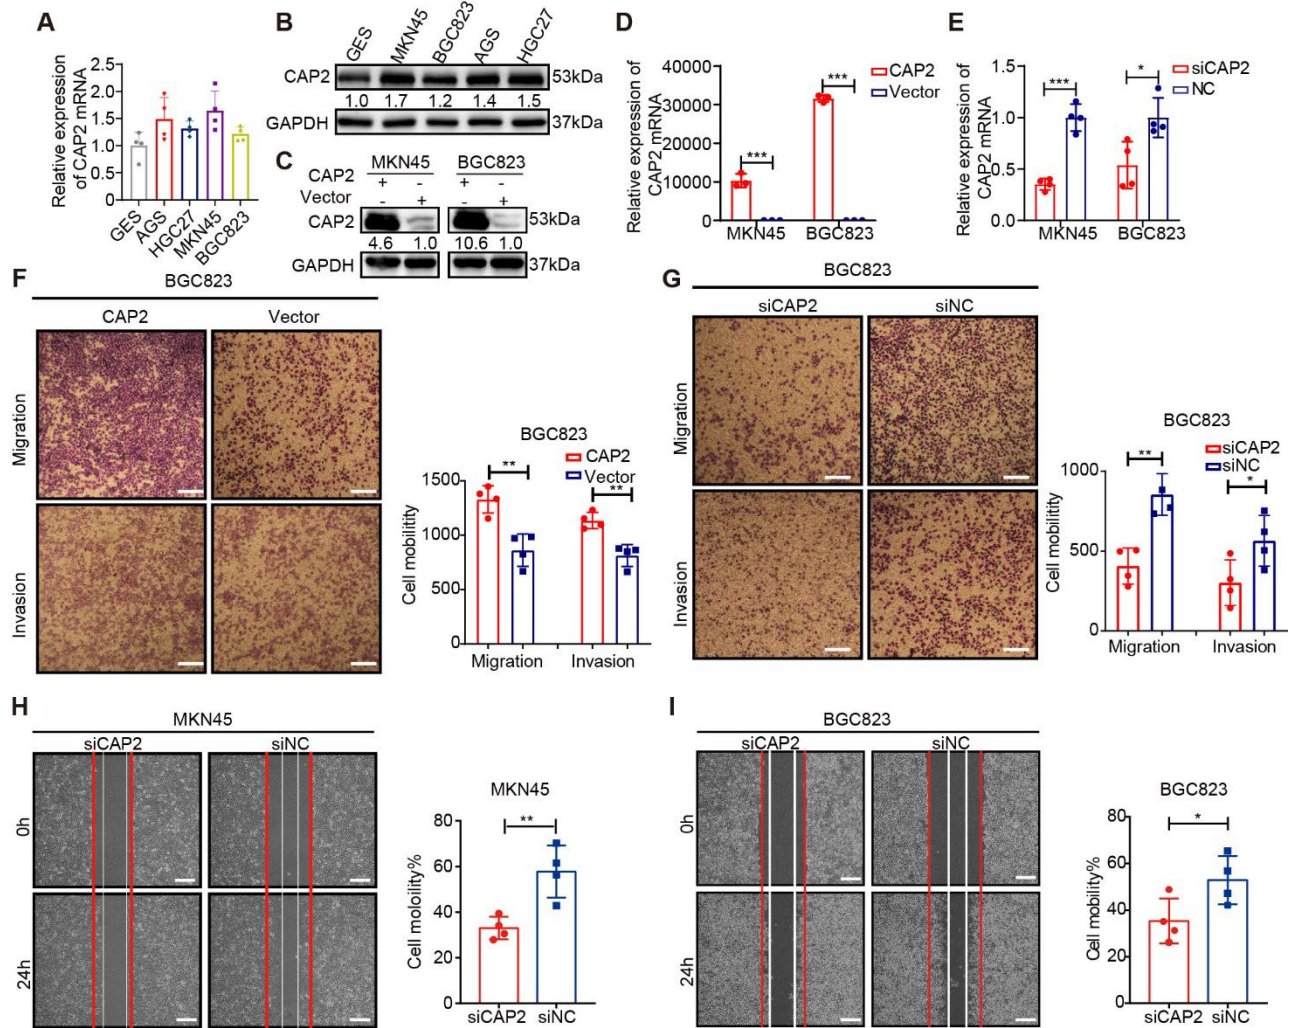

**Supplemental Figure 3. CAP2 promotes GC progression.** (A) qPCR detected mRNA expression of CAP2 in one immortalized gastric epithelial cell and four GC lines ( $n = 4$ ). (B) The western blot experiment examined the protein expression of CAP2 in one immortalized gastric epithelial cell and four gastric cancer lines. (C) The overexpression efficiency of CAP2 was detected by western blot. (D) The overexpression efficiency of *CAP2* in GC cells was detected by RT-PCR ( $n = 4$ ). (E) The knockdown efficiency of *CAP2* in GC cells was detected by RT-PCR ( $n = 4$ ). (F and G) The migration and invasion ability of MKN45 cells was determined by Transwell assay. Scale bar: 200  $\mu\text{m}$ , magnification  $\times 40$  ( $n = 4$ ). (H and I) The migration ability of MKN45 and BGC823 cells was determined by a cell scratch test. Scale bar: 100  $\mu\text{m}$ . ( $n = 4$ ). Two-tailed unpaired Student's *t* test (D-I). \* $P < 0.05$ , \*\* $P < 0.01$ , \*\*\* $P < 0.001$ .

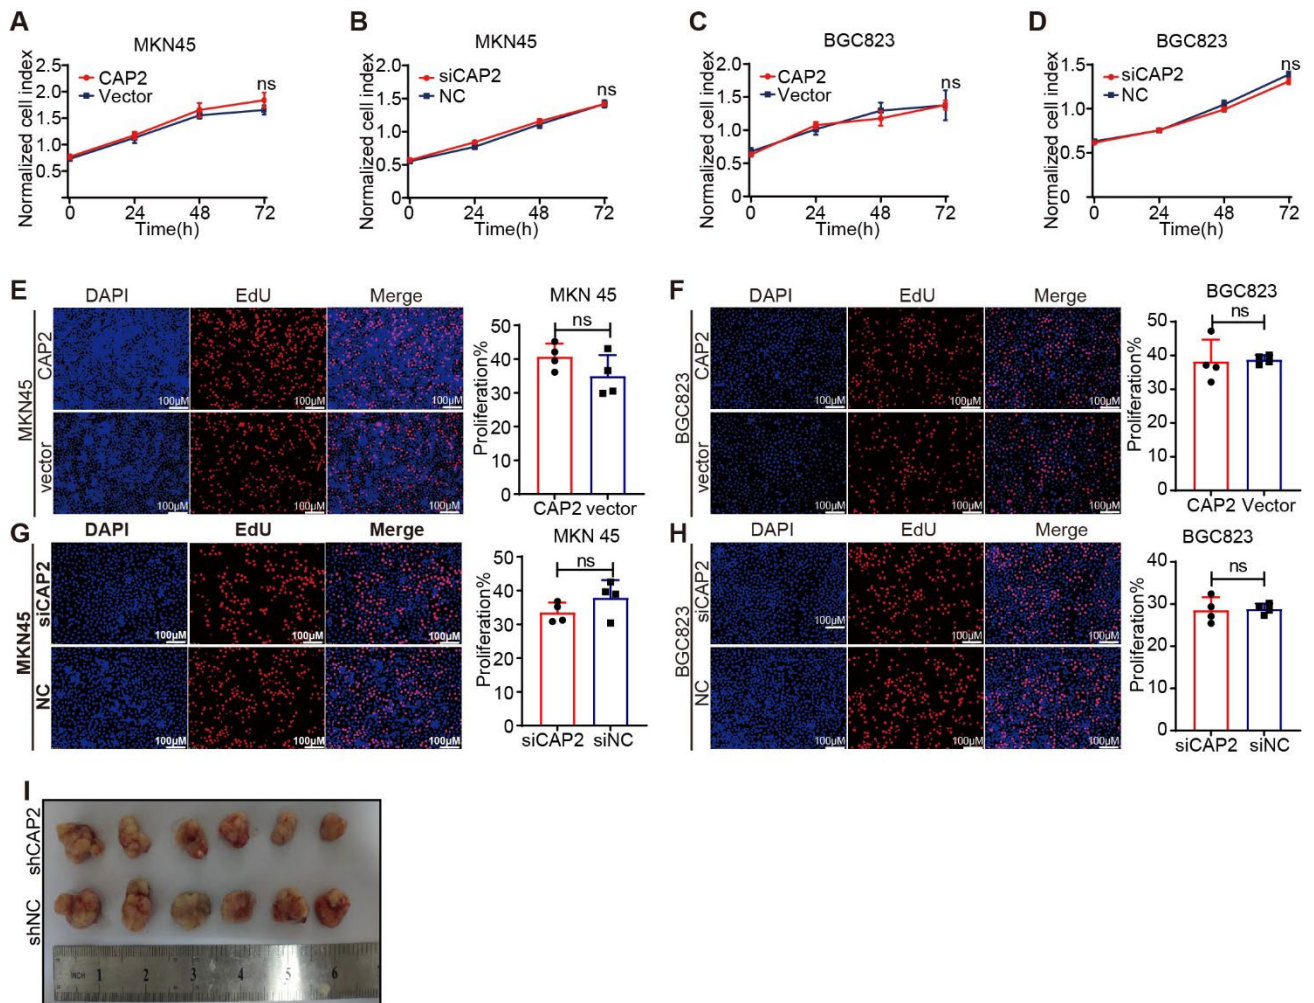

**Supplemental Figure 4. The effect of CAP2 on gastric cancer proliferation. (A-D)** Cell viability was measured using CCK8 assay in MKN45 and BGC823 cells. **(E-H)** Cell proliferation ability was detected by EdU ( $n = 3$ ). Scale bar: 100  $\mu\text{m}$ . **(I)** LV-shCAP2 or negative control was used for mouse subcutaneous tumorigenesis experiments. At 36 days after the subcutaneous injection, dissect the tumor and take pictures. Data are presented as the mean  $\pm$  SD. ns, not significant. Two-tailed unpaired Student's t test (A-H).

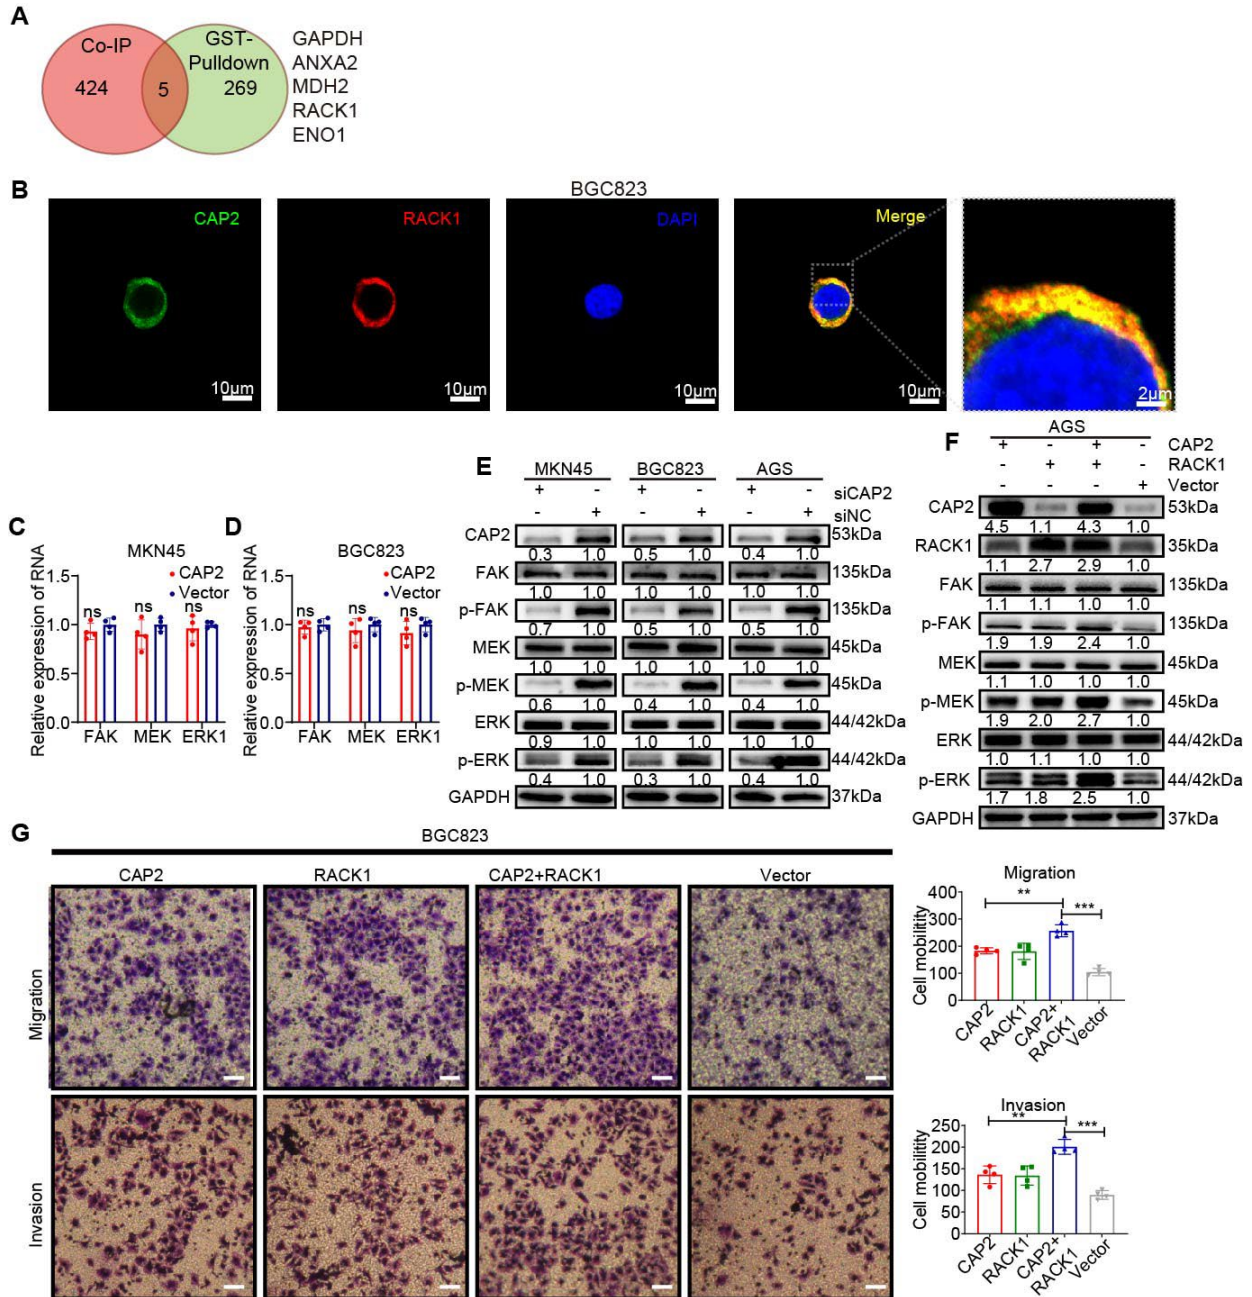

**Supplemental Figure 5. CAP2 binds to RACK1 and activates the FAK/MEK/ERK axis. (A)** Proteins obtained from co-IP ( $n = 424$ ) and GST pulldown ( $n = 269$ ). **(B)** Immunofluorescence analysis showed the CAP2/RACK1 colocalization in BGC823 cells. Scale bar: 10  $\mu\text{m}$ ; 2  $\mu\text{m}$ (right). **(C and D)** The effect of CAP2 on the mRNA expression of *FAK/MEK/ERK* was detected by RT-PCR ( $n = 4$ ). **(E)** Western blotting analysis of the FAK/MEK/ERK signaling after knockdown of CAP2 in GC cells. **(F)** Effects of CAP2 and RACK1 on FAK/MEK/ERK signaling were detected by Western blot. **(G)**, The migration ability of GC cell lines was determined by Transwell assay. Scale bar: 50  $\mu\text{m}$ . Data are presented as the mean  $\pm$  SD. Two-tailed unpaired Student's t test (C, D), one-way ANOVA with Tukey's multiple comparison test (G). ns, not significant. \* $P < 0.05$ , \*\* $P < 0.01$ , \*\*\* $P < 0.001$ .

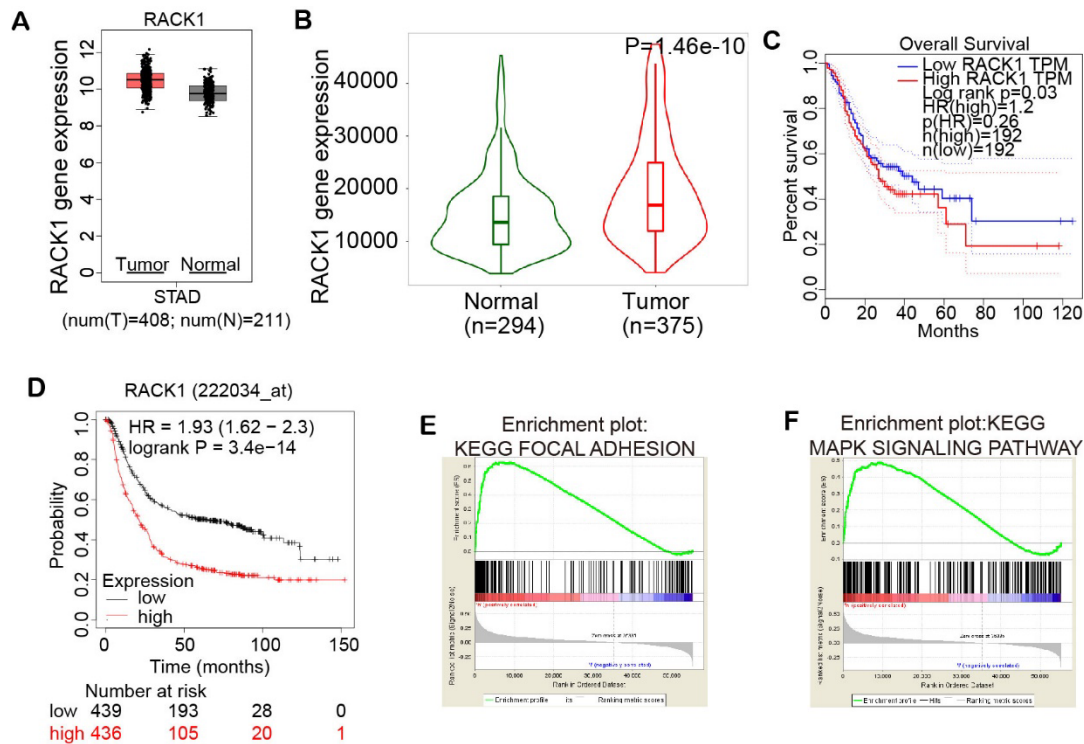

**Supplemental Figure 6. Effects of RACK1 on gastric cancer.** (A and B) GEPIA (E) and TNMplot (F) databases were used to analyze the expression of *RACK1* in gastric cancer and normal tissues. (C) GEPIA showed that patients with high expression of RACK1 had shorter overall survival. (D) The Kaplan–Meier Plotter showed that patients with high expression of RACK1 had poorer overall survival (<http://kmplot.com/analysis/>,  $P = 3.4e-14$ ). (E and F) GSEA analysis showed that CAP2 expression was positively related with focal adhesion and MAPK signaling pathways.

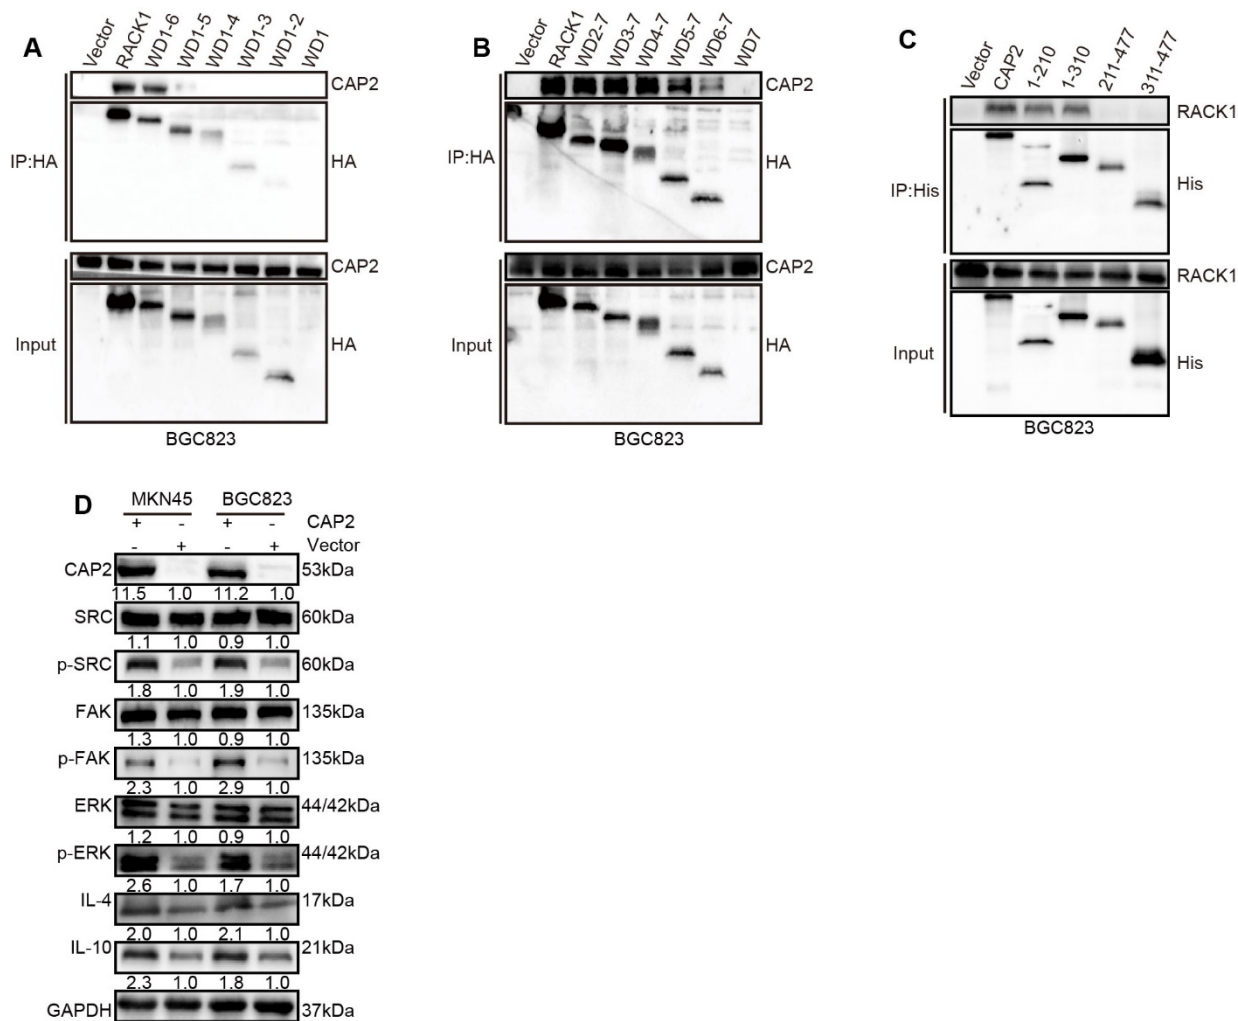

**Supplemental Figure 7. CAP2 competitively binds to domains WD5 to WD7 of RACK1.** (A) HA-tagged wt-RACK1, WD6-1, WD5-1, WD4-1, WD3-1, WD2-1, and WD1 were overexpressed in BGC823 cells, and anti-HA-tagged antibodies were used for co-immunoprecipitation. (B) HA-tagged wt-RACK1, WD2-7, WD3-7, WD4-7, WD5-7, WD6-7, and WD7 were overexpressed in BGC823 cells, and anti-HA-tagged antibodies were used for immunoprecipitation. (C) Overexpression of His-tagged wt-CAP2, CAP2(1-210bp), CAP2(1-310bp), CAP2(211-477bp), and CAP2(311-477bp) in BGC823 cells, immunoprecipitated with an anti-His-tag antibody. (D) Western blotting detected the expression and phosphorylation level of the SRC/FAK/ERK signaling pathway in GC cells with overexpression of CAP2.

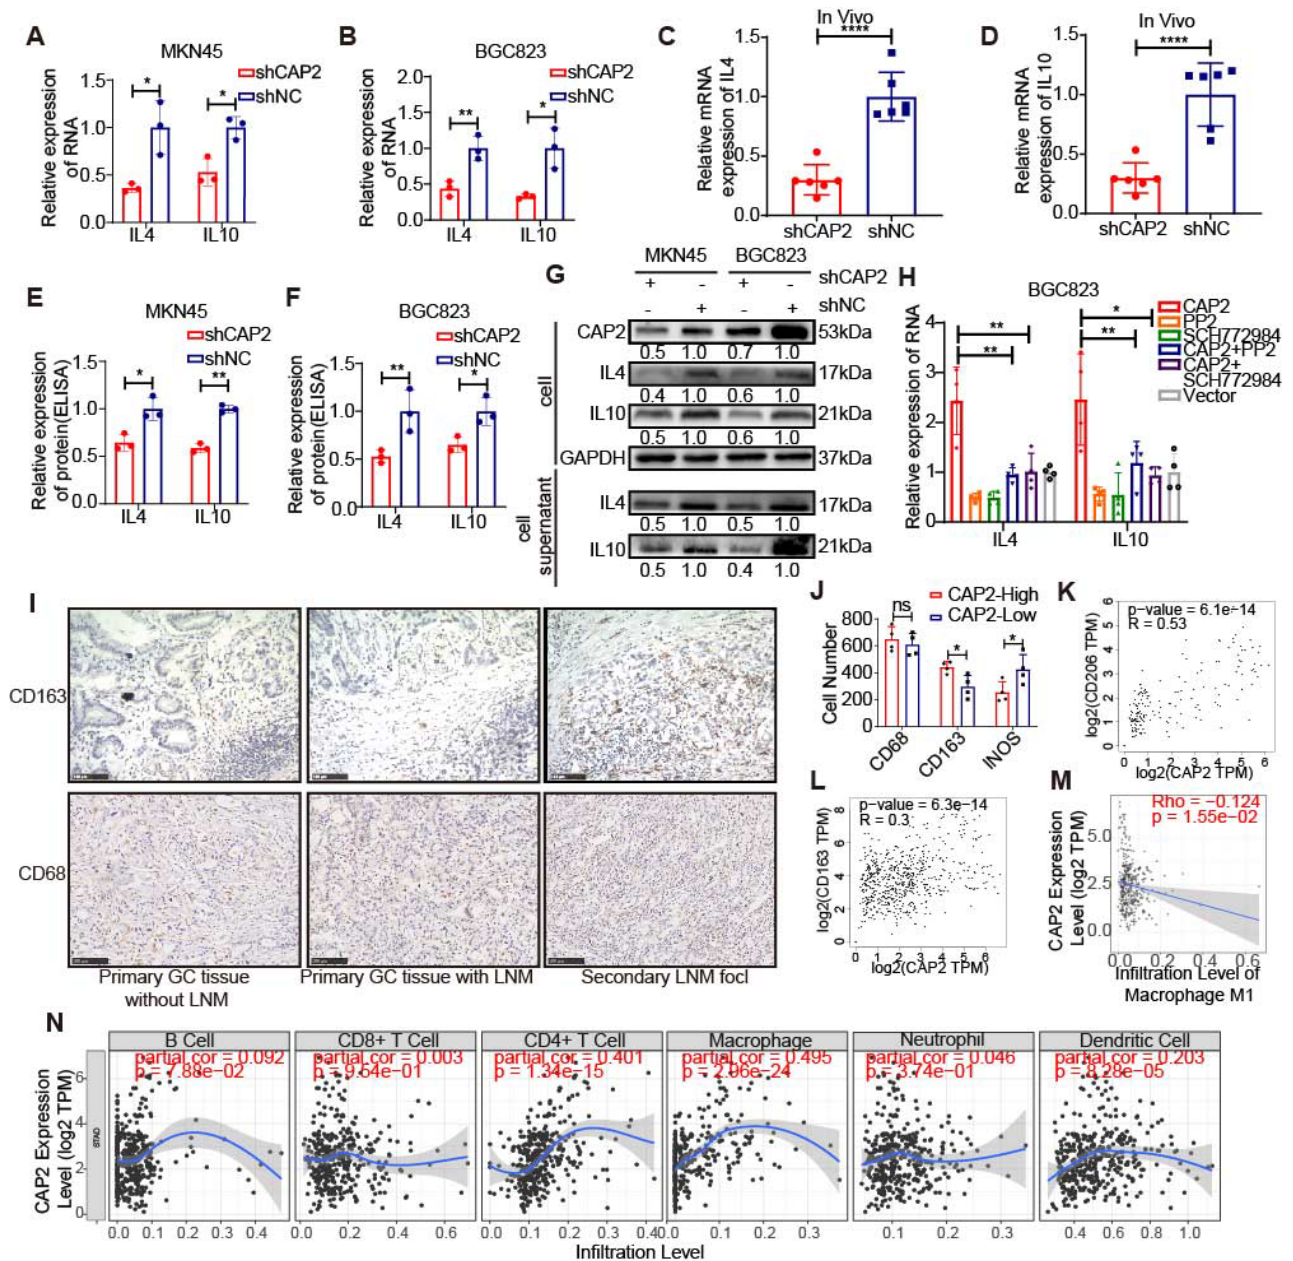

**Supplemental Figure 8. CAP2 promotes IL4 and IL10 secretion by activating ERK. (A and B)** The mRNA level of *IL4* and *IL10* in CAP2 knockdown was assessed using qPCR ( $n = 3$ ). **(C and D)** The mRNA levels of *IL4* and *IL10* in xenografted tumors were assessed using PCR ( $n = 6$ ). **(E and F)** Expression levels of IL4 and IL10 in the supernatant of GC cells were detected by ELISA ( $n = 3$ ). **(G)** After the knockdown of CAP2, GC cell supernatants were concentrated using ultrafiltration tubes and subjected to Western blotting. **(H)** SRC inhibitor (PP2) and ERK inhibitor (SCH772984) were added to BGC823 cells, and the RNA levels of *IL4* and *IL10* were detected by qPCR ( $n = 4$ ). **(I)** The expression of CD68 and CD163 in tissues was measured using IHC. Scale bar: 100  $\mu$ m. **(J)** Number of CD68+, CD163+, and iNOS+ cells per field in tissues from GC patients

( $n = 4$ ). **(K)** The correlation between *CAP2* and *CD206* expression was analyzed with the GEPIA database. **(L)** The correlation between *CAP2* and *CD163* expression was analyzed with the GEPIA database. **(M)** Relationship between *CAP2* and macrophage cell infiltration was analyzed using the TRIME2.0 website. **(N)** The correlation between *CAP2* expression and immune cell infiltration was analyzed with TIMER 2.0. Data are presented as the mean  $\pm$  SD. Two-tailed unpaired Student's t test (A-F, and J), one-way ANOVA with Tukey's multiple comparison test (H). \* $P < 0.05$ , \*\* $P < 0.01$ , \*\*\* $P < 0.001$ .



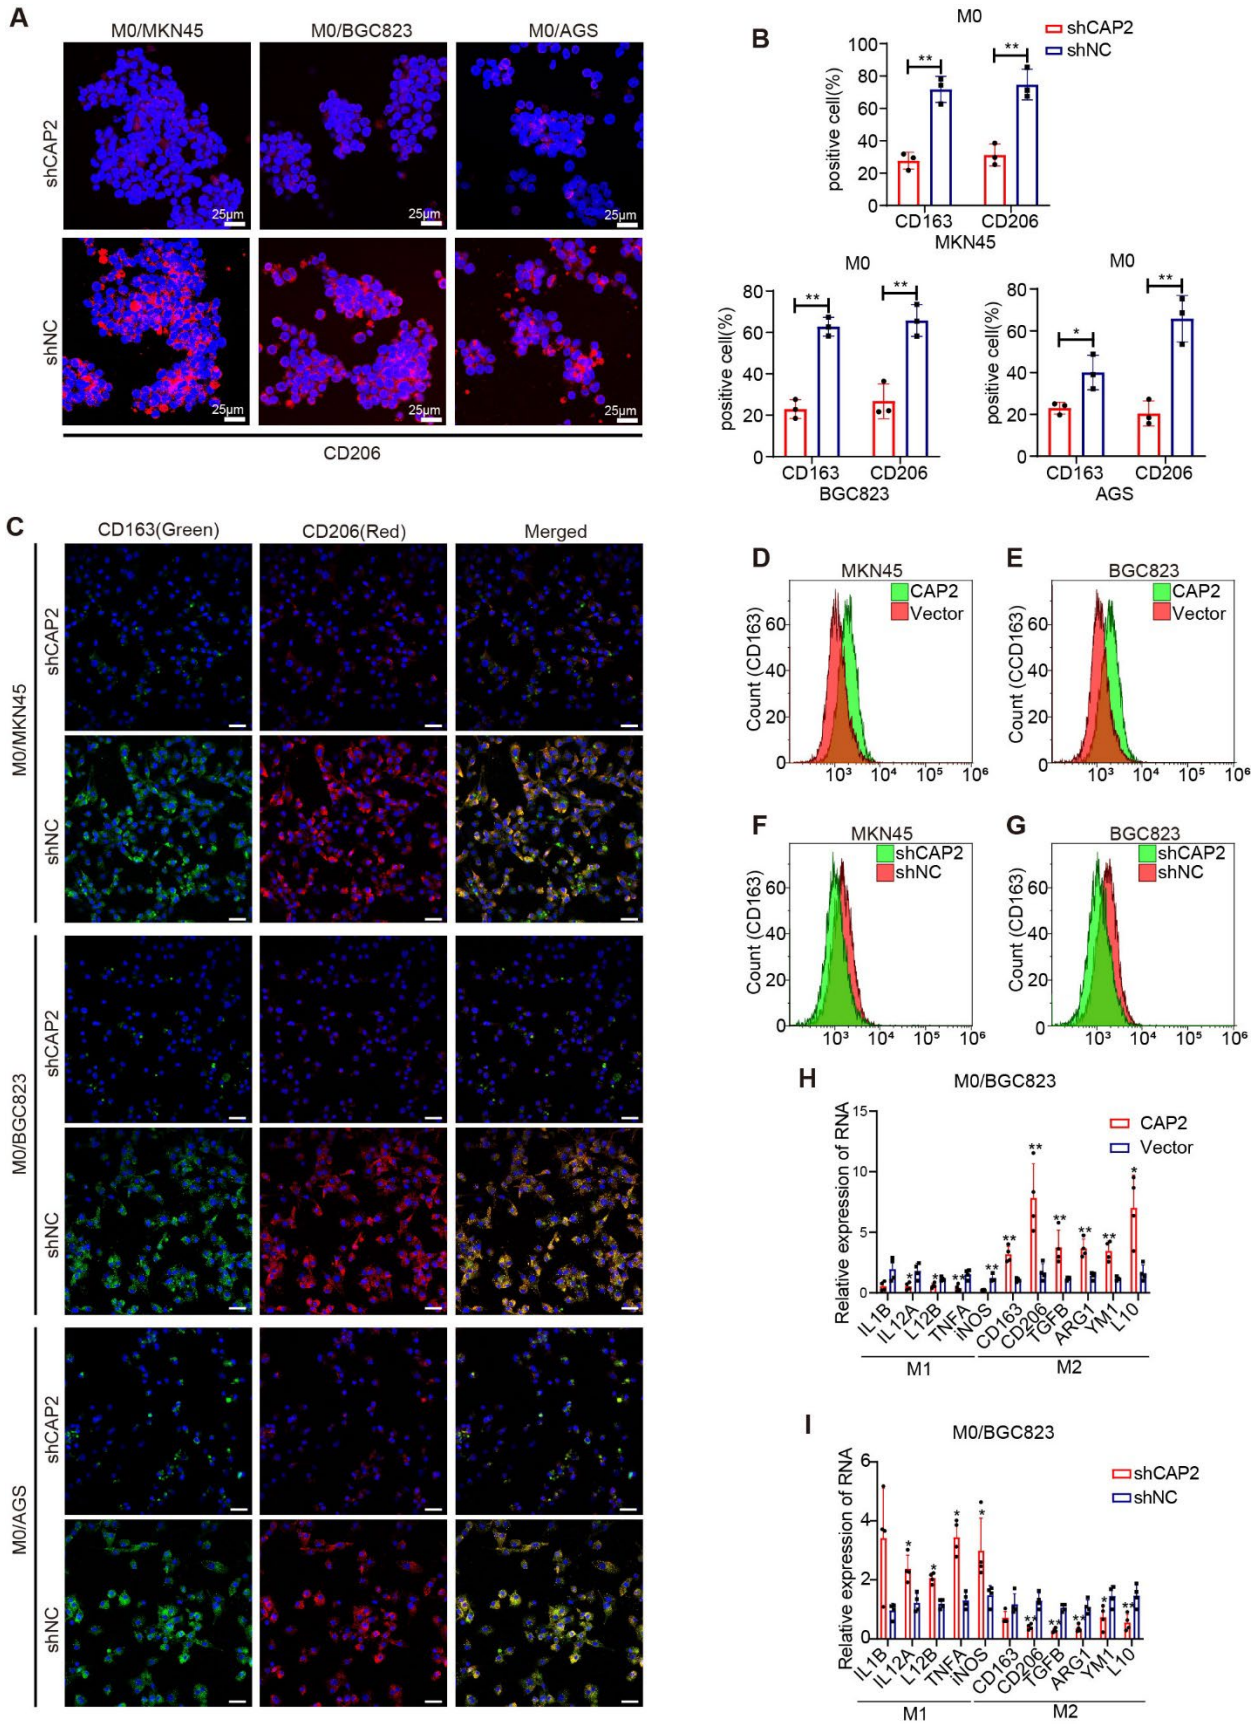

Supplemental Figure 9. CAP2 promotes macrophage polarization to the M2 phenotype. (A)

Expression of CD206 in macrophages was detected by immunofluorescence. Red staining indicates CD206 expression. Scale bar: 25  $\mu\text{m}$ . **(B)** The quantitative data of CD163 and CD206 expression in immunofluorescence assays ( $n = 3$ ). **(C)** The expression of CD163 and CD206 in macrophages was detected by immunofluorescence. Green staining indicates CD163; red staining indicates CD206; blue staining indicates DAPI (Scale bar: 50  $\mu\text{m}$ ). **(D–G)** Expression of CD163 in macrophages was detected using flow cytometry. **(H and I)** Expression of markers for M1 and M2 macrophages after co-culture of BGC823 cells and macrophages ( $n = 4$ ). Data are presented as the mean  $\pm$  SD. Two-tailed unpaired Student's t test (B, H, and I). \* $P < 0.05$ , \*\* $P < 0.01$ , \*\*\* $P < 0.001$ .

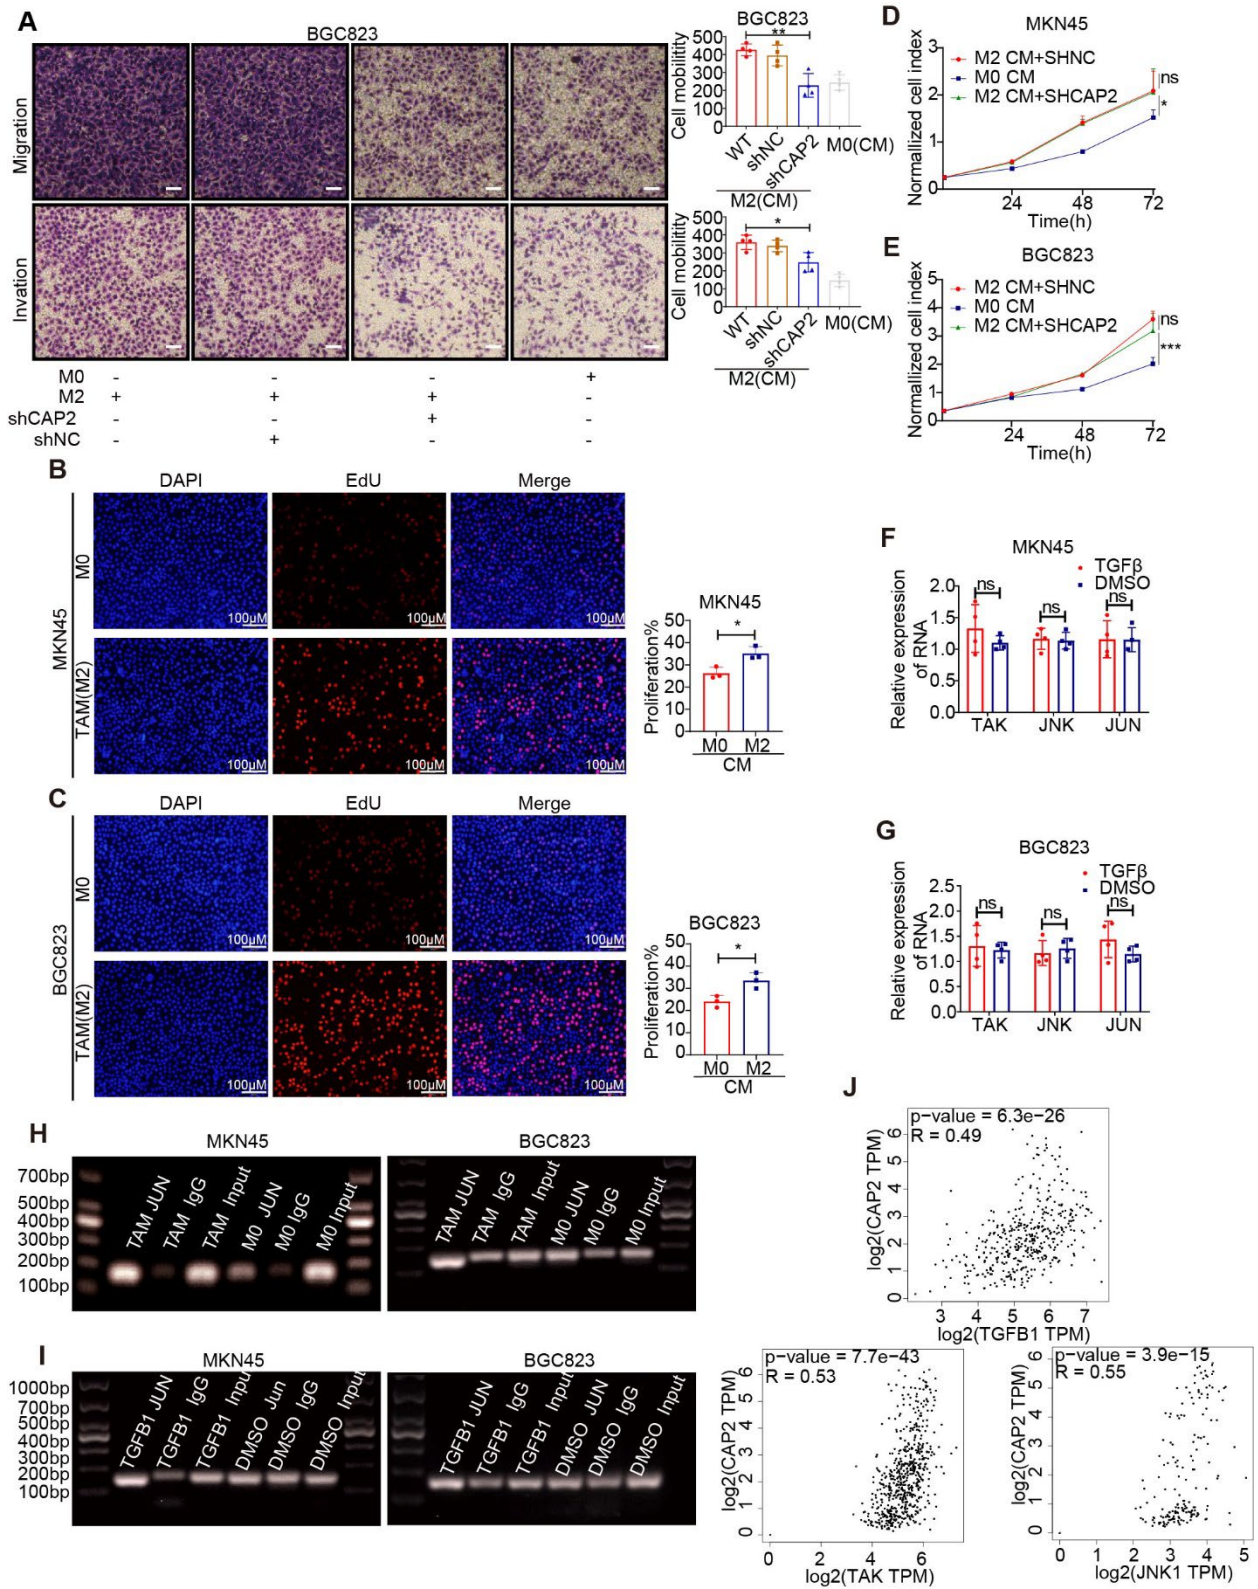

**Supplemental Figure 10. TAMs promote CAP2 expression through TGFβ1-mediated activation of JUN. (A)** The migration and invasion abilities of GC cells were determined by Transwell assay after the GC cells were induced by TAM-conditioned medium ( $n = 4$ ). Scale bar:

50  $\mu\text{m}$ , **(B and C)** The cell proliferation abilities were detected by EdU after GC cells were induced by TAMs conditioned medium (Scale bar = 100  $\mu\text{m}$ ,  $n = 3$ ). **(D and E)** The cell viability was detected by CCK-8 after GC cells were induced by TAM-conditioned medium ( $n = 5$ ). **(F and G)** The mRNA expression of *TAK/JNK/JUN* were detected by RT-PCR after GC cells were treated with TGF $\beta$ 1 ( $n = 4$ ). **(H and I)** DNA electropherogram for the ChIP assays. The binding ability of JUN to the *CAP2* promoter region was detected by ChIP after GC cells were treated with TGF $\beta$ 1 or induced by TAMs conditioned medium. **(J)** The correlation between *CAP2* and *TGF $\beta$ 1*, *TAK*, and *JNK* was analyzed by GEPIA. Data are presented as the mean  $\pm$  SD. one-way ANOVA with Tukey's multiple comparison test (A, D, and E), Two-tailed unpaired Student's t test (B, C, F, and G). \* $P < 0.05$ , \*\* $P < 0.01$ , \*\*\* $P < 0.001$ .

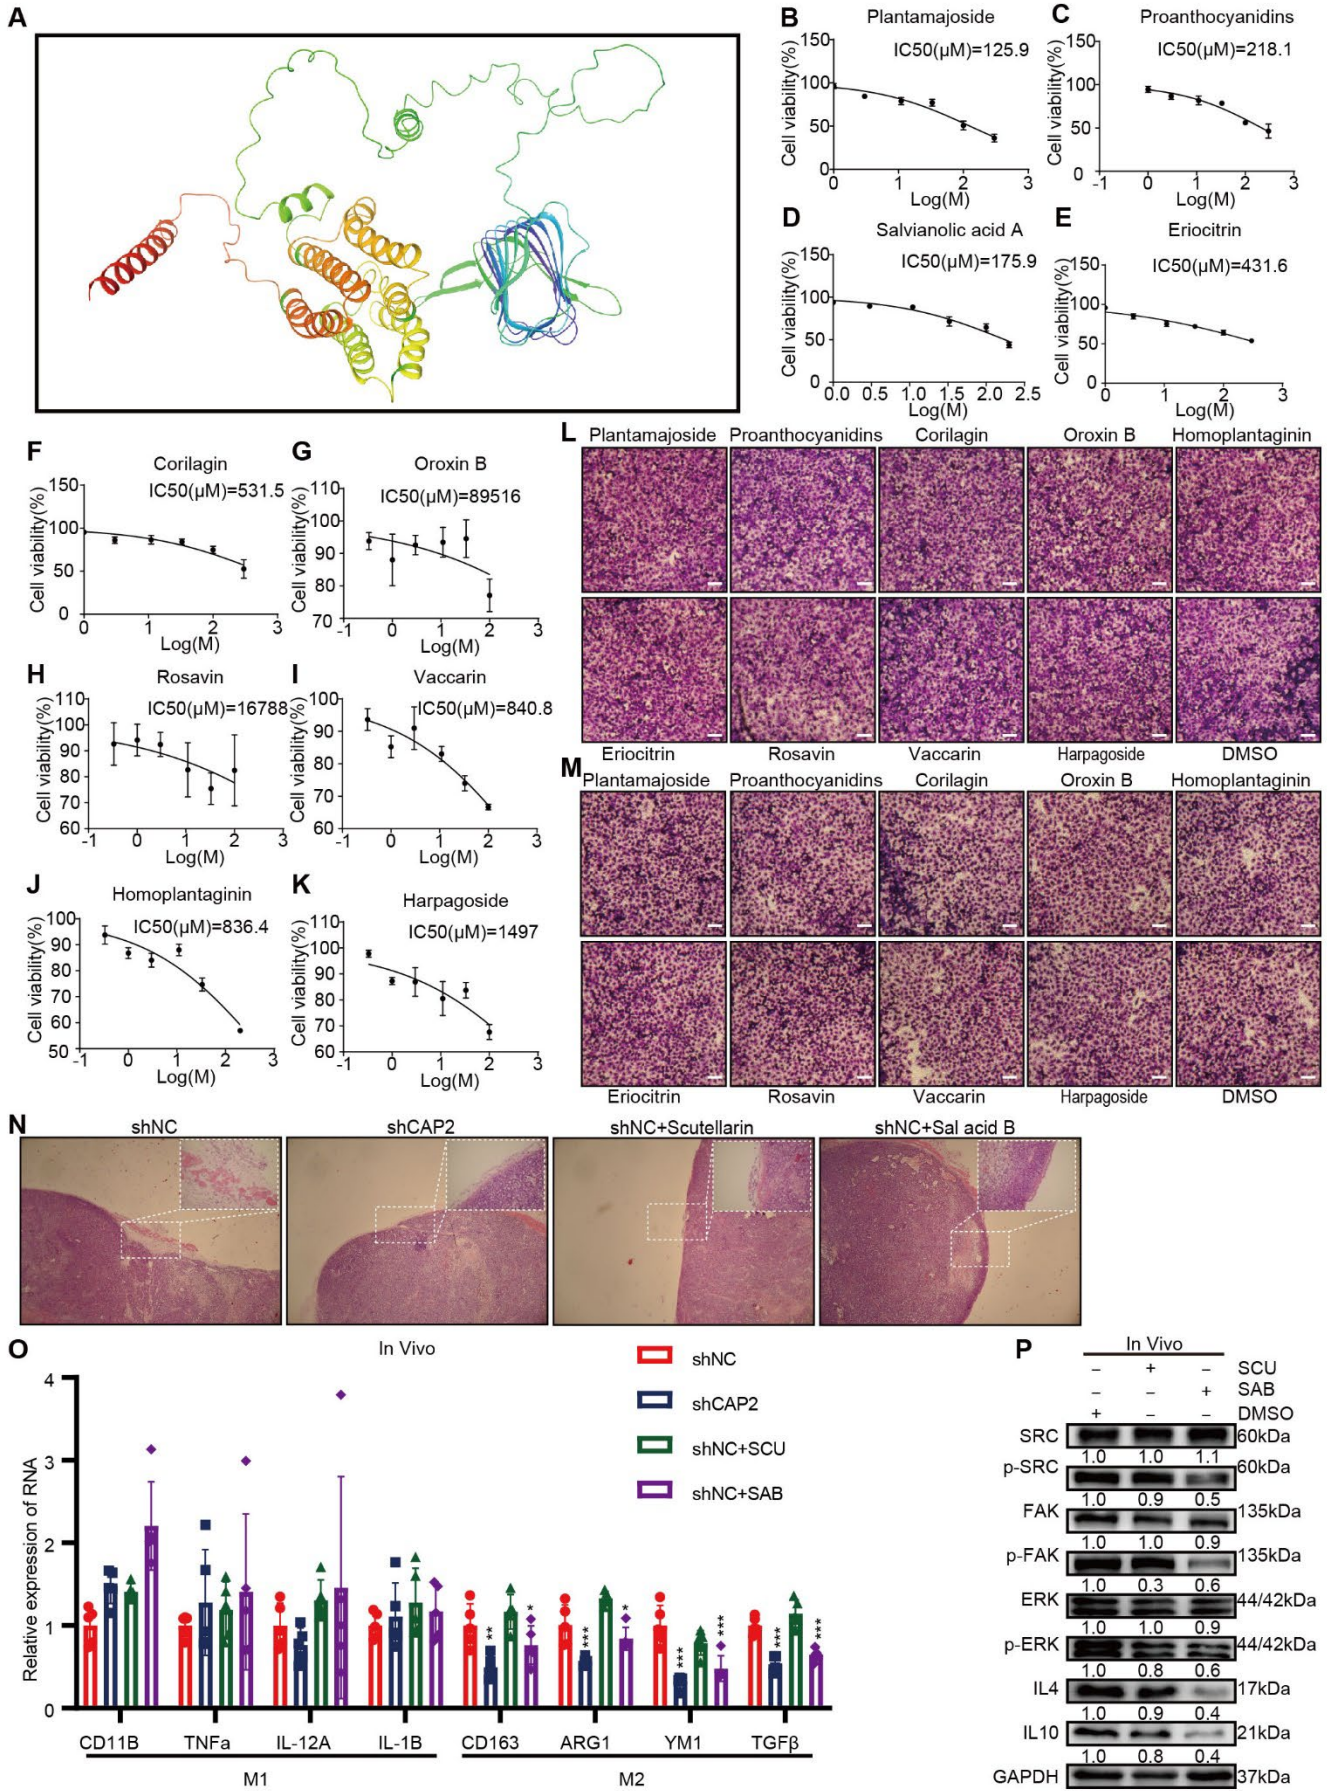

**Supplemental Figure 11. Screening and in vivo experiments of small molecule inhibitors.** (A) The protein structure of CAP2 was predicted using AlphaFold. (B-K) Determination of IC<sub>50</sub> of inhibitors on MKN45 cells. After treatment of gastric cancer cells with a series of doses (1, 3.5, 11, 33, 100, 300  $\mu$ M) of inhibitors for 48 h, cell viability was determined by CCK8. (L and M) Transwell migration assay of MKN45 and BGC823 treated with inhibitor. Scale bar: 50  $\mu$ m. (N) Mice subcutaneously injected with LV-NC MKN45 cells were treated with Scutellarin (SCU) and Salvianolic acid B (SAB), and then xenograft tumors were harvested. HE staining was used to observe tumor cell infiltration. (O) The expression of markers for infiltrating macrophages in the xenograft tumors was detected with qPCR ( $n = 5$ ). (N) The expression of SRC/FAK/ERK/IL4/IL10 in the xenograft tumors was detected with western blot. Data are presented as the mean  $\pm$  SD. one-way ANOVA with Tukey's multiple comparison test (O). \* $P < 0.05$ , \*\* $P < 0.01$ , \*\*\* $P < 0.001$ .

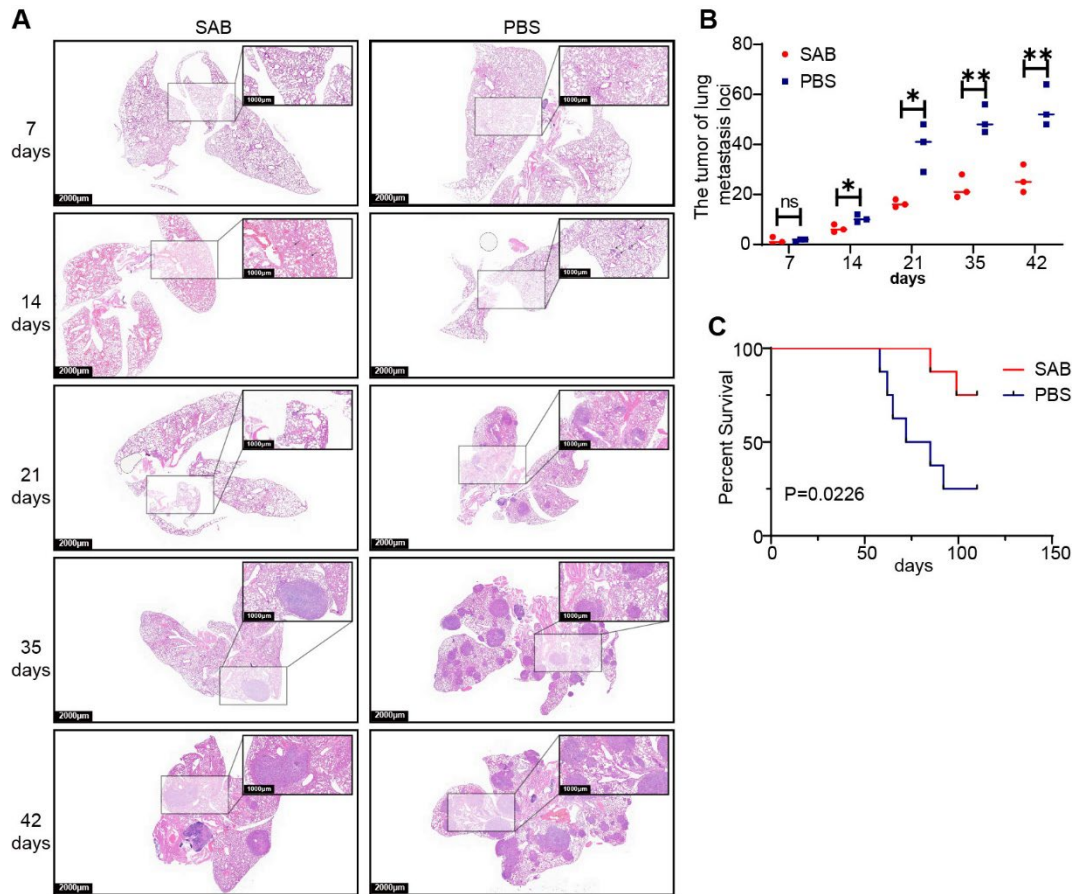

**Supplemental Figure 12. Salvanolic acid B inhibits lung metastasis of GC cells.** (A) Lung tissue was isolated 7, 14, 21, 35, and 42 days after tumor implantation for H&E staining to assess tumor metastasis. Scale bar: 2 mm; 1 mm (insets). (B) The number of transplanted tumors in the lungs of nude mice ( $n = 3$ ). (C) The Kaplan–Meier analysis of animal endpoint survival. Each color represents a different experimental group: the SAB group (red,  $n = 8$ ) and the control PBS group (blue,  $n = 8$ ). \* $P < 0.05$ , Two-tailed unpaired Student’s t test (B), logrank test (C). \*\* $P < 0.01$ , \*\*\* $P < 0.001$ .

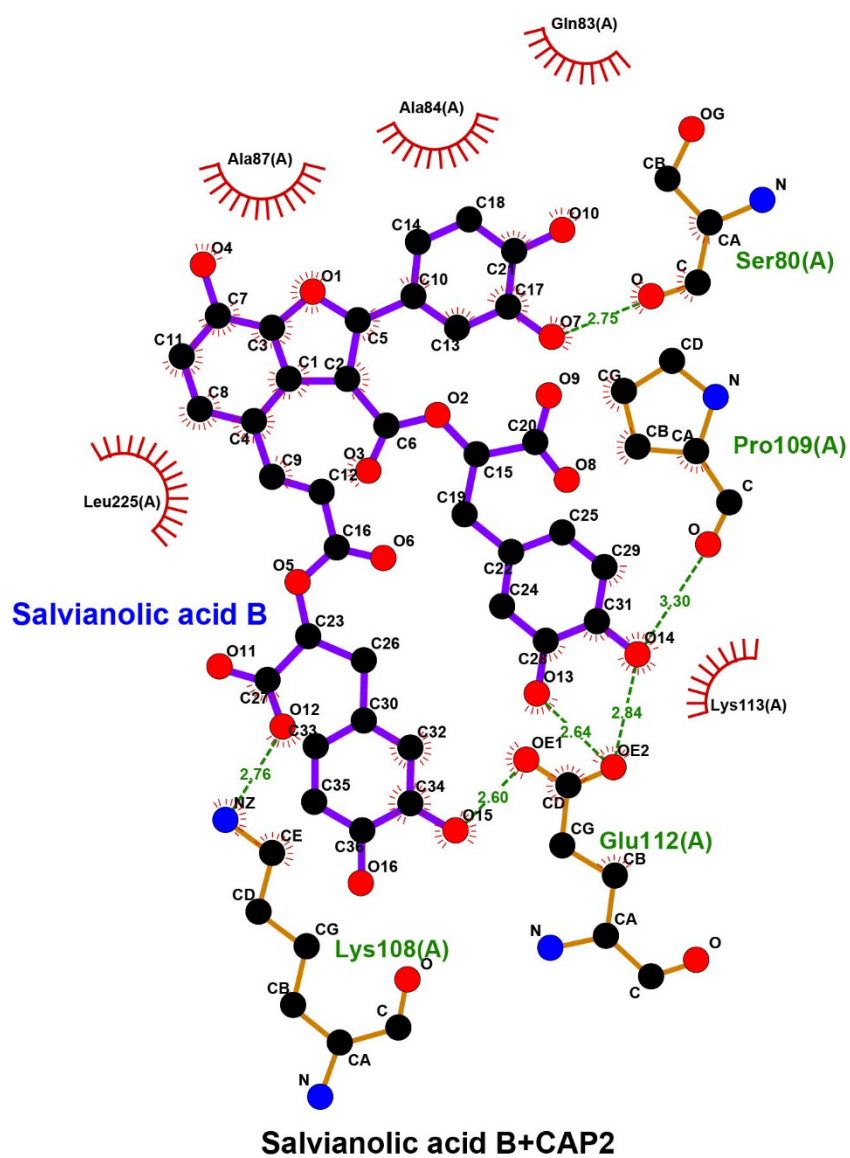

Supplemental Figure 13. The schematic illustration for the binding between CAP2 and Salvianolic acid B.



## **Supplementary Materials and Methods**

### **Cell proliferation assay**

Cells were plated at 5000 cells/well in 96-well plates at 24, 48, and 72 hours after infection or conditioned medium (CM) induction using Cell Counting Kit-8 (CCK-8) (Solarbio, Beijing, China) Measure cell proliferation assay. Add 10  $\mu$ L of CCK8 reagent to each well, incubate at 37°C for 2 hours, then measure the optical density at 450nm.

### **EdU experiment**

$2 \times 10^4$  GC cells transfected or co-cultured with macrophages were seeded into 96-well plates. After 12 hours, the EdU solution was added to the medium. Experiments were performed according to the instructions of EdU kit (Ribobio, Guangzhou, China). Cells were incubated with EdU reaction mixture and counterstained with DAPI. Observe and record using a fluorescence microscope.

### **Induction of macrophages and co-culture of cells**

To obtain mature macrophages (M0), THP1 cells were added with 100 ng/ml of phorbol 12-myristate 13-acetate (MCE, New Jersey, USA) and induced for 48 hours. M2 macrophages were obtained by incubating M0 macrophages in a complete medium containing 20 ng/ml of IL4 and 20 ng/ml of IL13 for 48 hours. The co-culture system of GC and macrophages used the Transwell system (Corning, Corning, USA).  $3 \times 10^5$  GC cells were added to the upper chamber, and an equal amount of M0 or M2 macrophages were added to the lower chamber. After 48 hours, cells in the upper and lower chambers were collected for subsequent experiments.

### **Co-immunoprecipitation**

Experiments were performed according to the instructions using a co-immunoprecipitation kit (Cat. 26149, Thermo Fisher). First use anti-CAP2 (2  $\mu$ g, Ct:15865; Proteintech), anti-RACK1 (2  $\mu$ g, Ct:27592; Proteintech), anti-HA (2  $\mu$ g, Ct:3724; CST) or anti-His (2  $\mu$ g, Ct:12698; CST) for antibody immobilization followed by incubation with GC cell lysates at 4°C overnight. Bound protein was eluted and detected by Western blot.

### **Immunofluorescence**

Fixed with 4% PFA and permeabilized with 0.1% Triton X-100. The primary antibody used is shown in Supplemental Table 4. Counterstaining with A488-labeled (1:100, SA00013-2, Proteintech) and A594-labeled (1:100, SA00013-3, Proteintech) secondary antibodies. Incubate overnight with the primary antibody at +4°C and with the secondary antibody for 30 min at room temperature. Immunofluorescence images were obtained by fluorescence confocal microscopy (Zeiss LSM 880).

### **Small molecule compound cytotoxicity assay**

Selected small molecule compounds were doubling dilutions (1, 3.5, 11, 33, 100, and 300  $\mu$ M) in a complete medium, and then MKN45 cells were cultured. After 48 hours, cell viability was determined by CCK8 assay. IC50 values were calculated using GraphPad Prism 9.

### **In vivo experiments with small molecule inhibitors**

For tumor-killing experiments,  $4 \times 10^5$  MKN45 cells were inoculated into the left axilla of 4-week-old male BALB/c nude mice (Vital River, Beijing, China). After GC cell seeding, local injections of drugs were administered for 36 days: SAB treatment (80  $\text{mg}\cdot\text{kg}^{-1}\cdot\text{day}^{-1}$ ), SCU treatment (40

mg·kg<sup>-1</sup>·day<sup>-1</sup>), and no treatment (PBS/day). Tumor volume is measured once a week. Mice were injected with  $4 \times 10^5$  MKN45 cells via their tail veins. All of the animals were then divided into two groups (23 in each group) and injected with either SAB (80 mg·kg<sup>-1</sup>·day<sup>-1</sup>) or PBS via their tail veins the day after GC cell seeding. Mice were euthanized on days 7, 14, 21, 35, and 42 (three per group), and H&E staining of lung sections was performed to check the lung metastasis status of mice. The monitoring of the survival status of the remaining mice was continued until the endpoint.
